# Supplementary material
Source: PubMed Central journal article supplement (PMC3707122)
Supplement: NIHMS485145-supplement-Suppl_Figures.pdf [file NIHMS485145-supplement-Suppl_Figures.pdf]

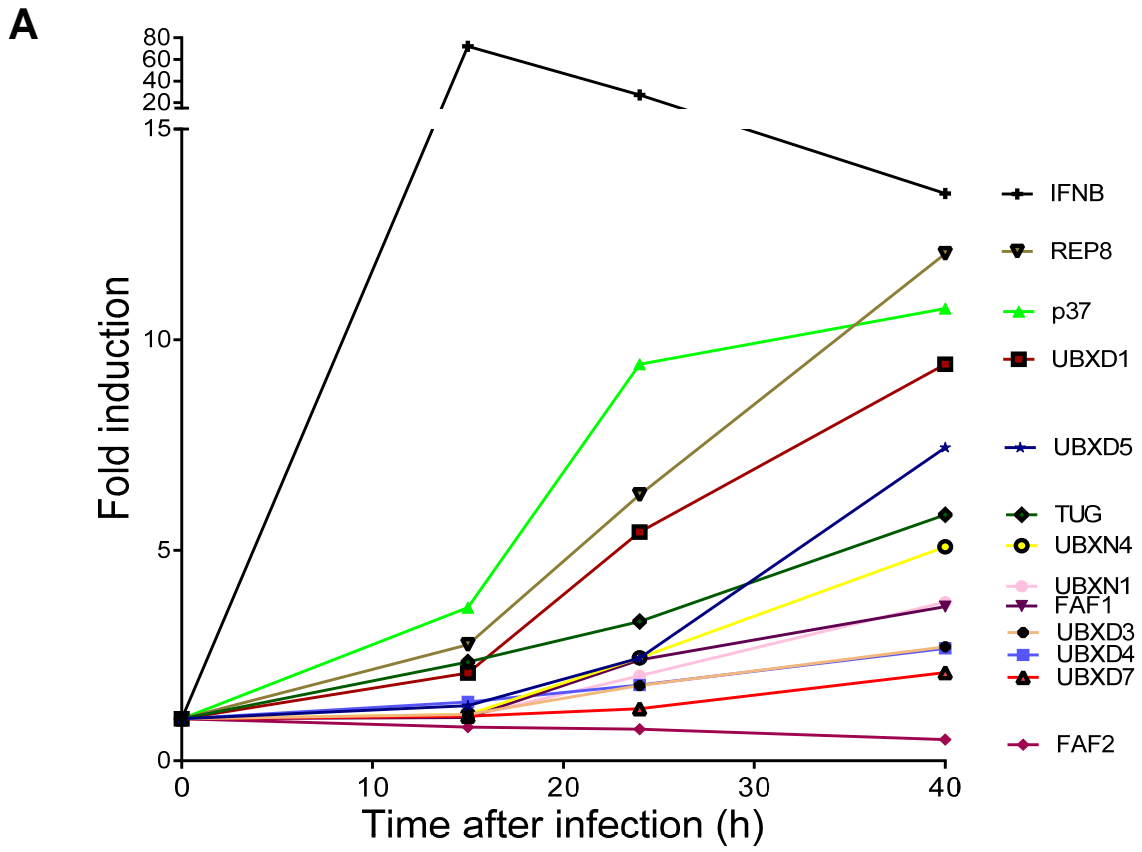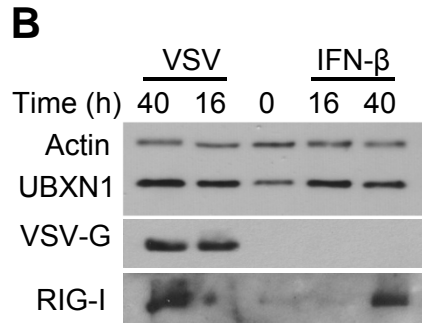

Figure S1

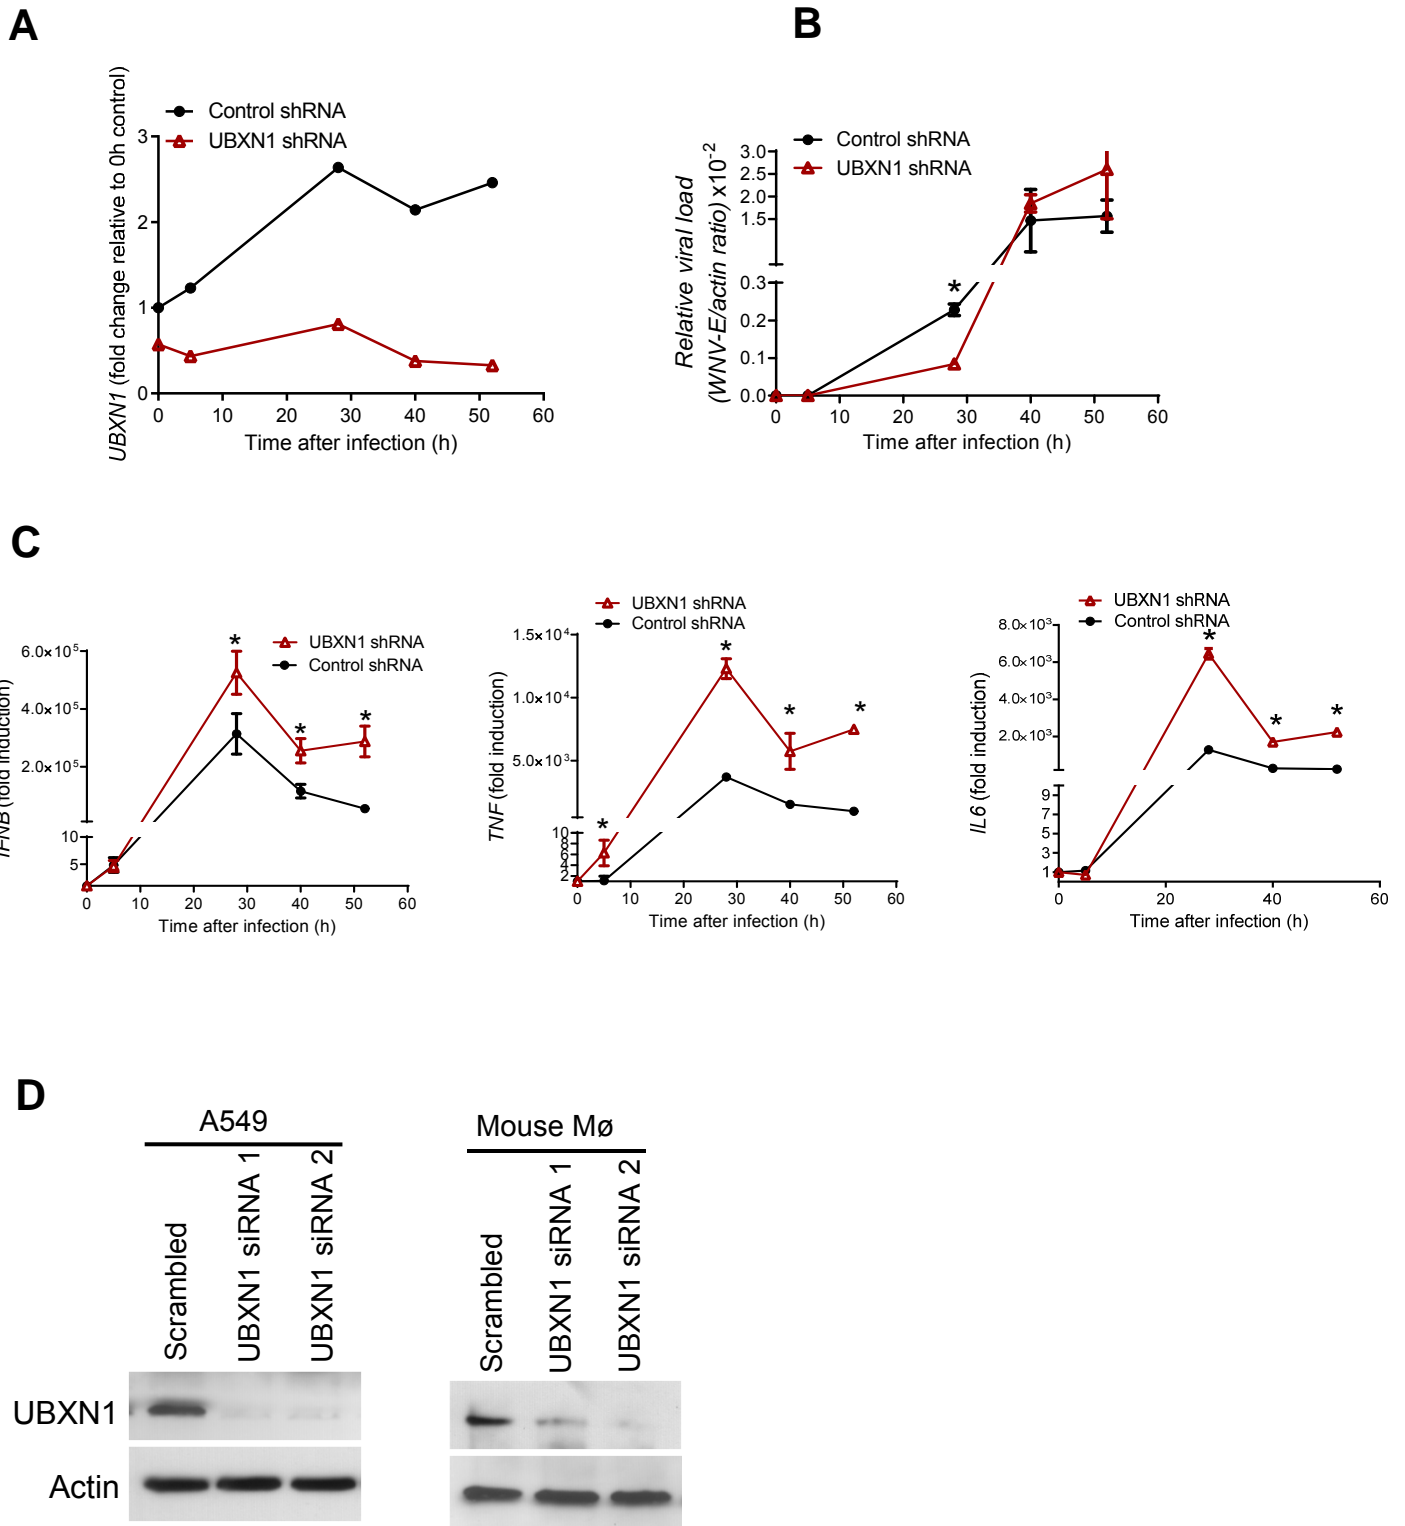

Figure S2

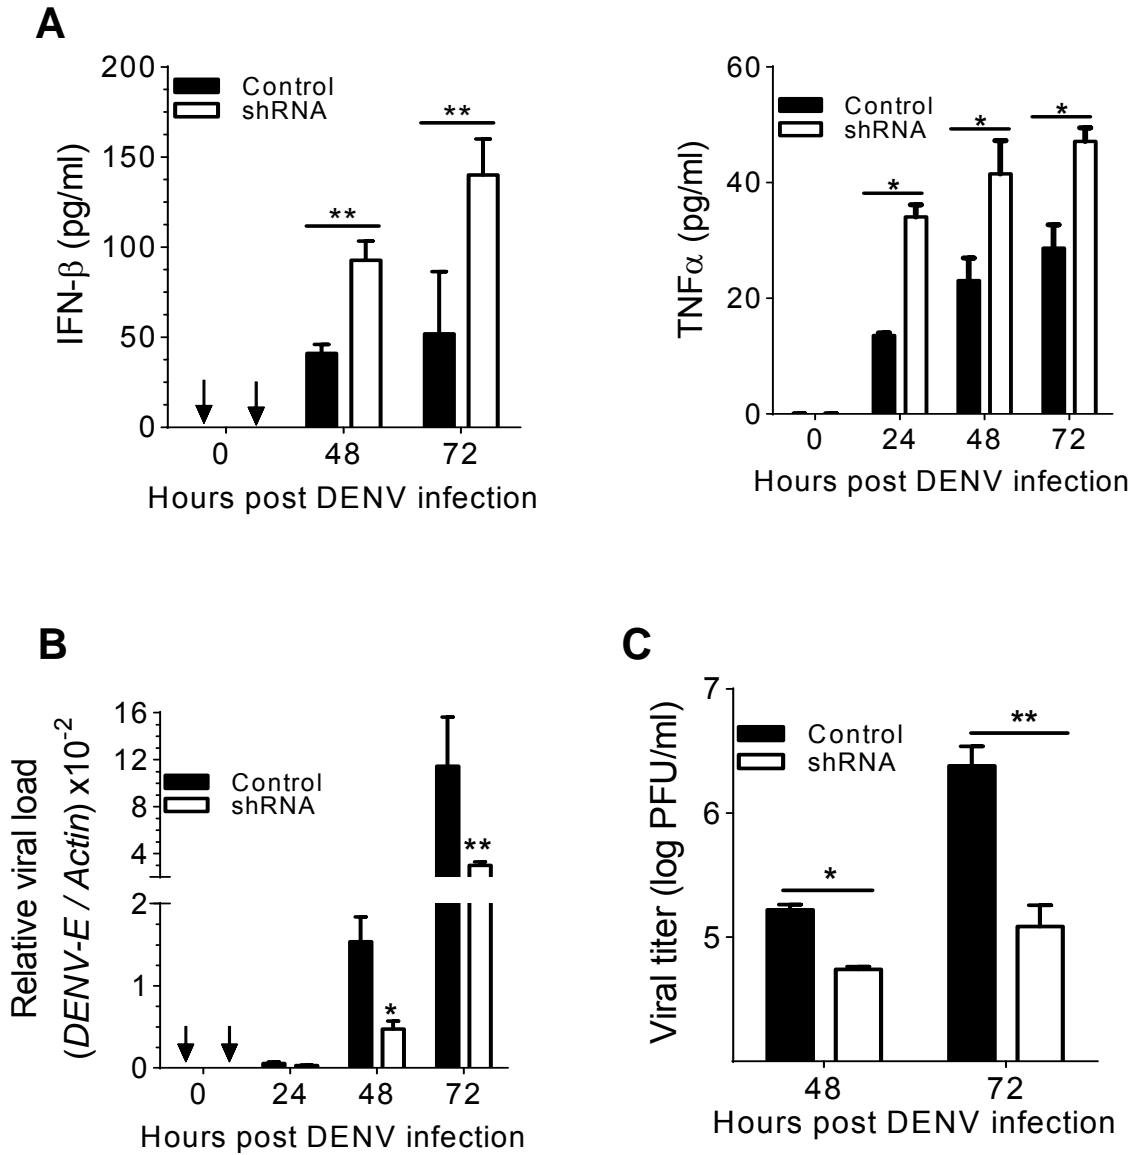

Figure S3

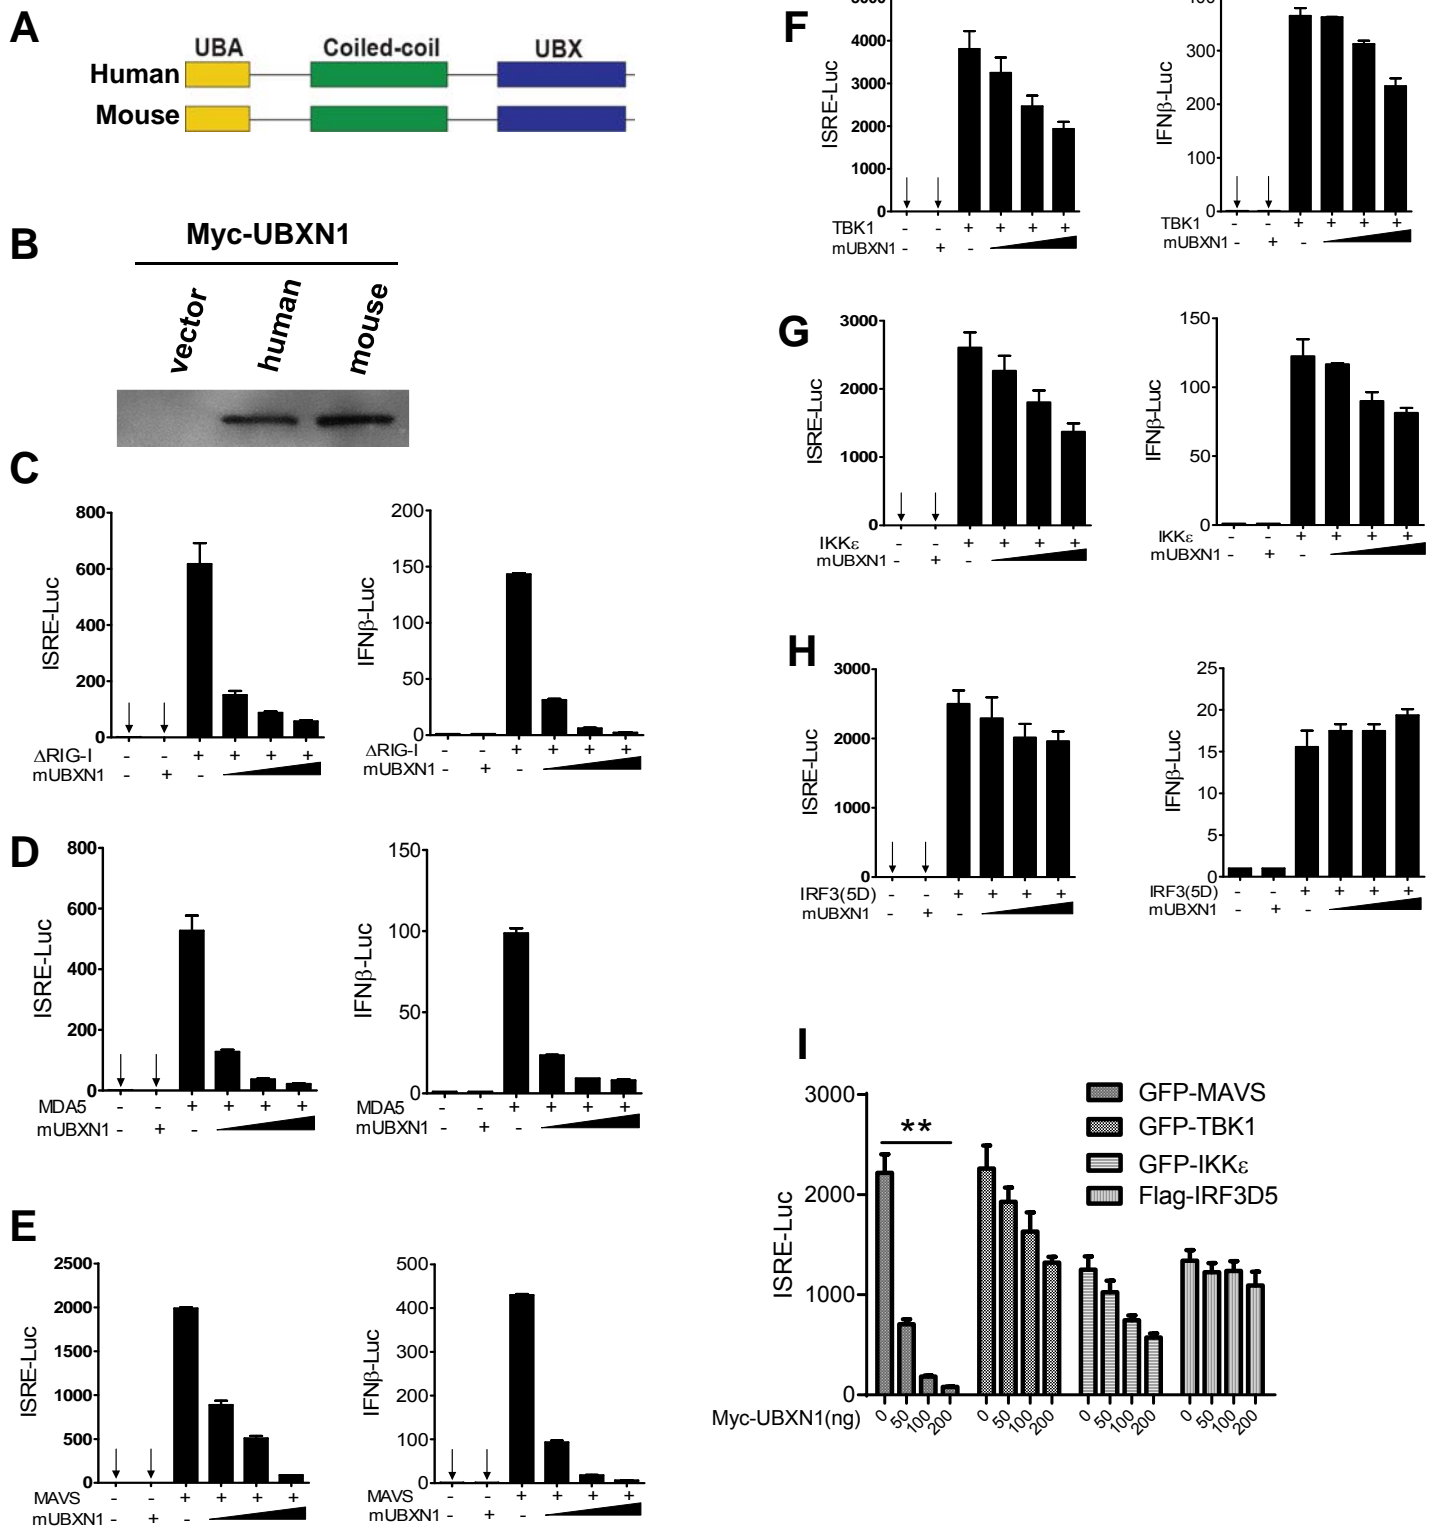

Figure S4

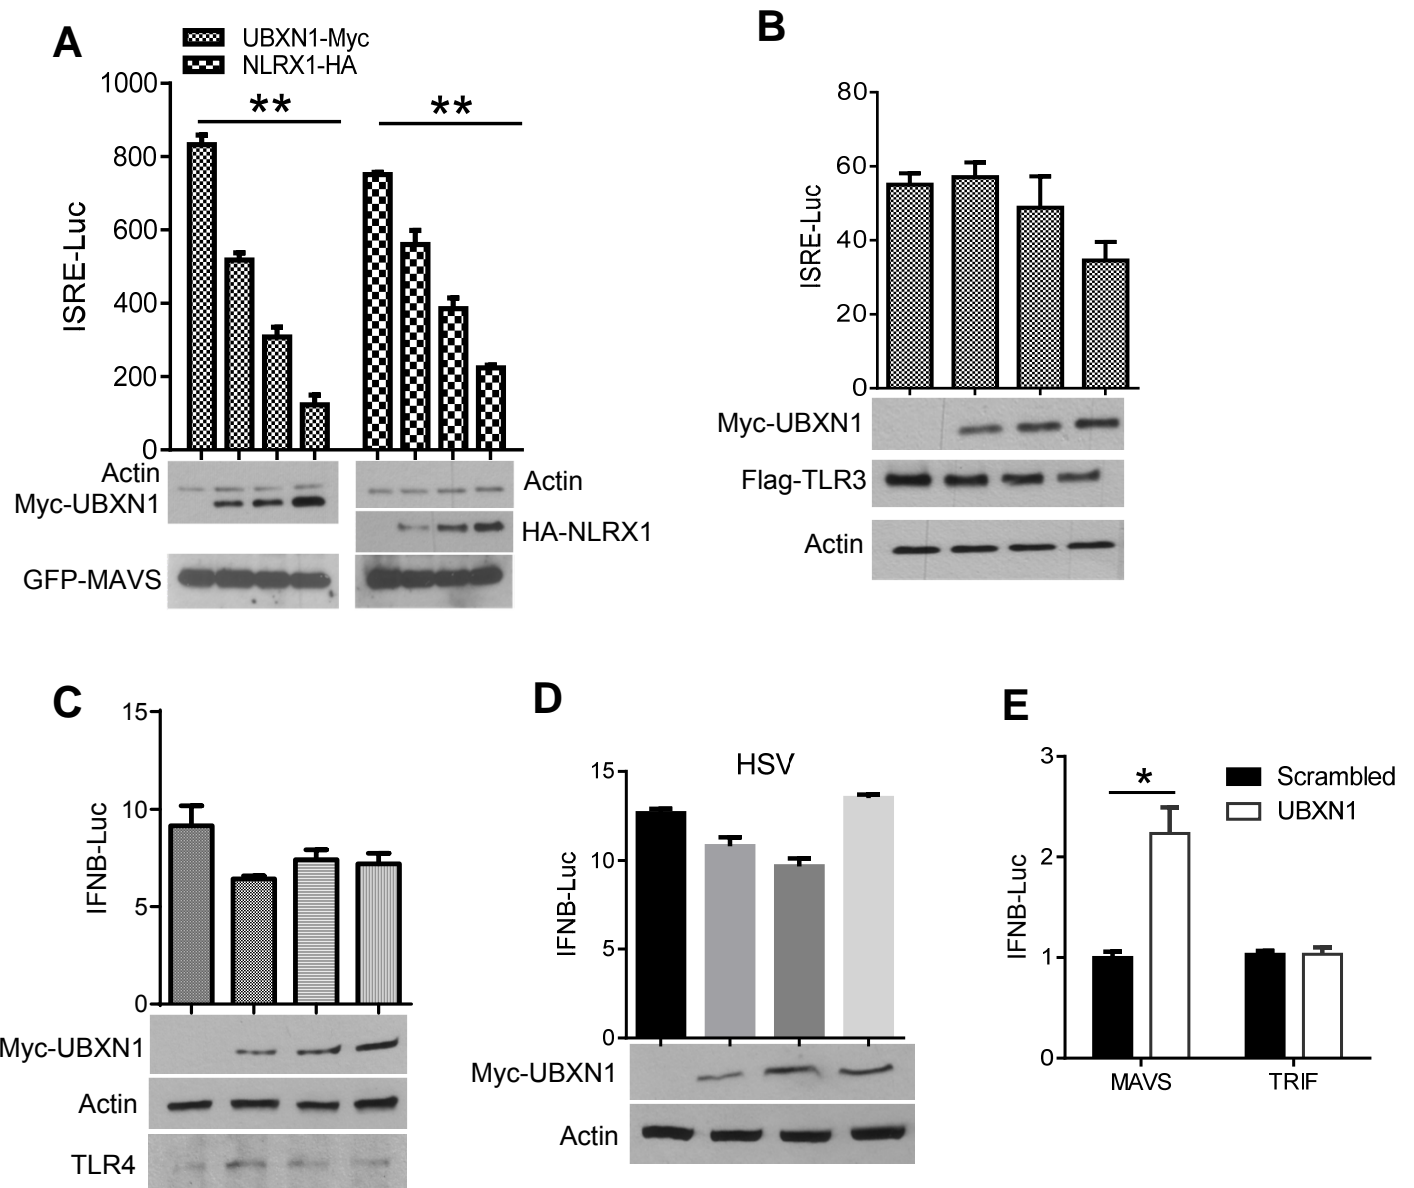

Figure S5

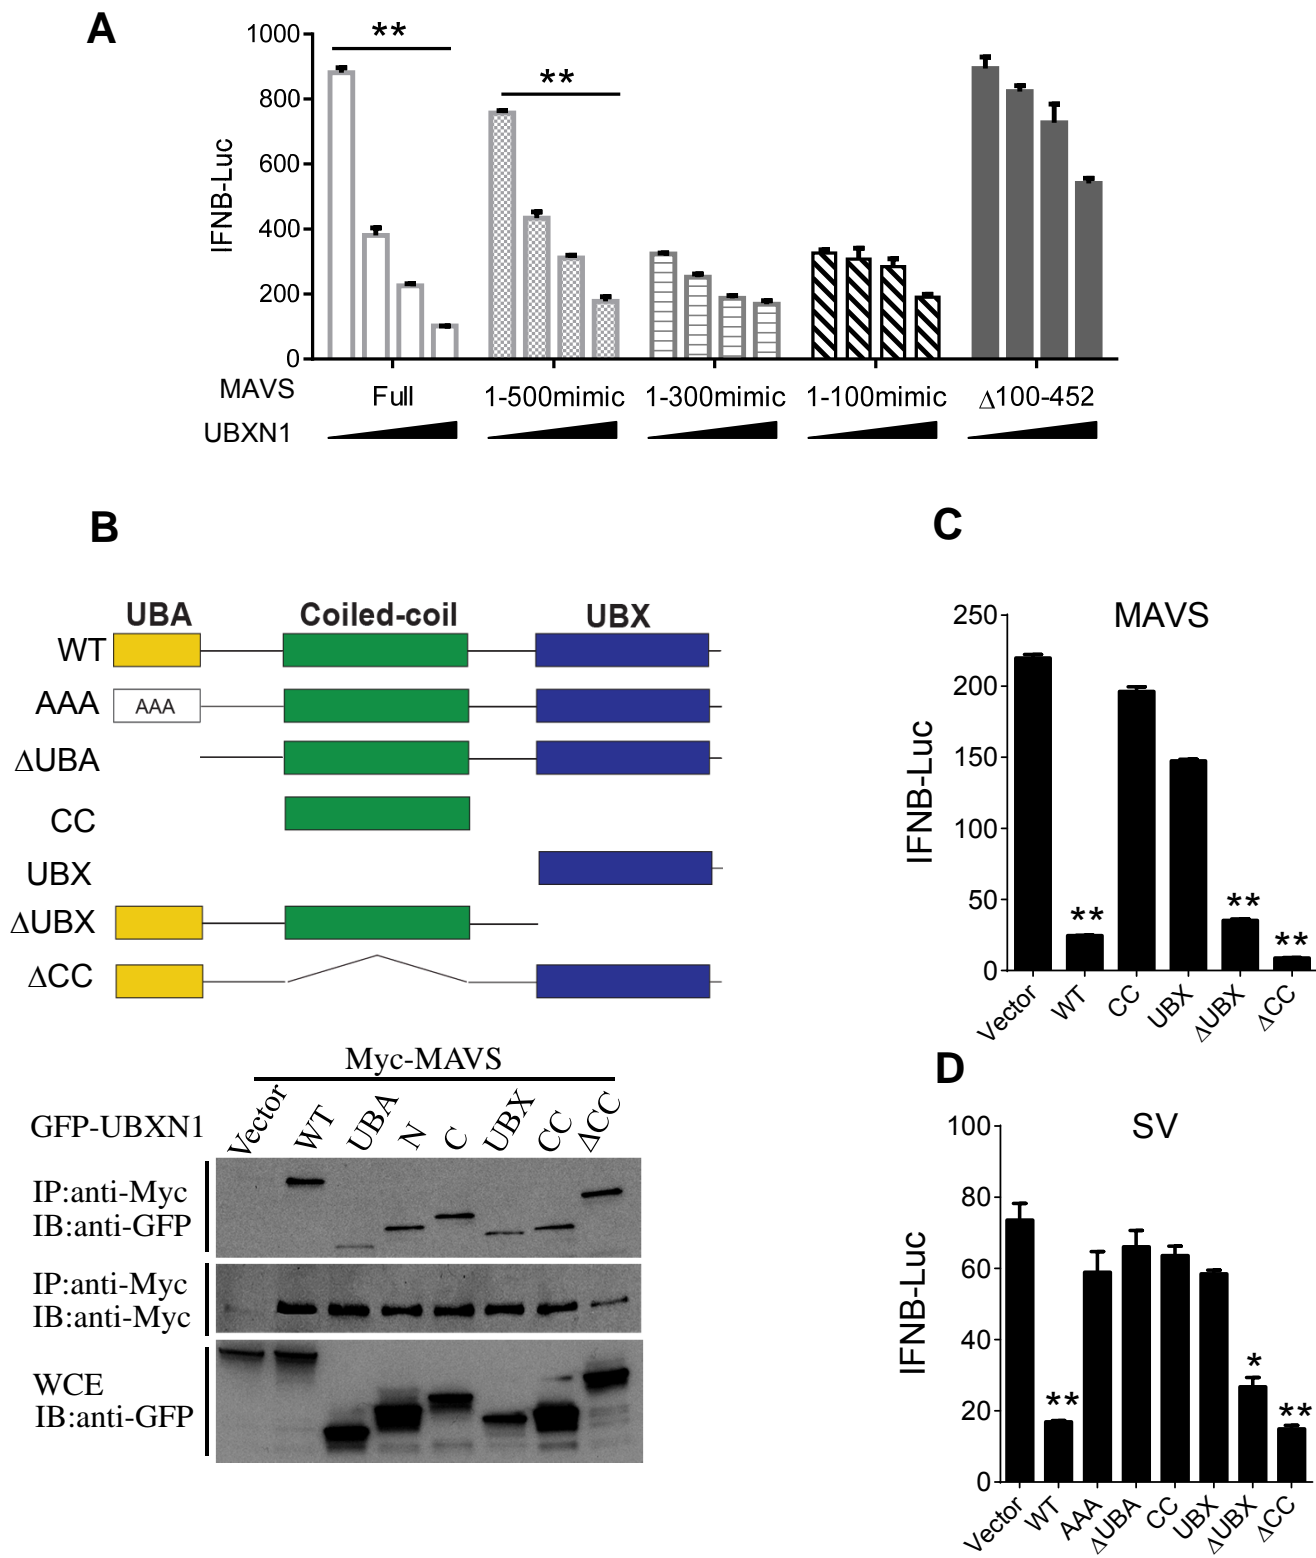

Figure S6

# MAVS-CFP+MAVS-eYFP

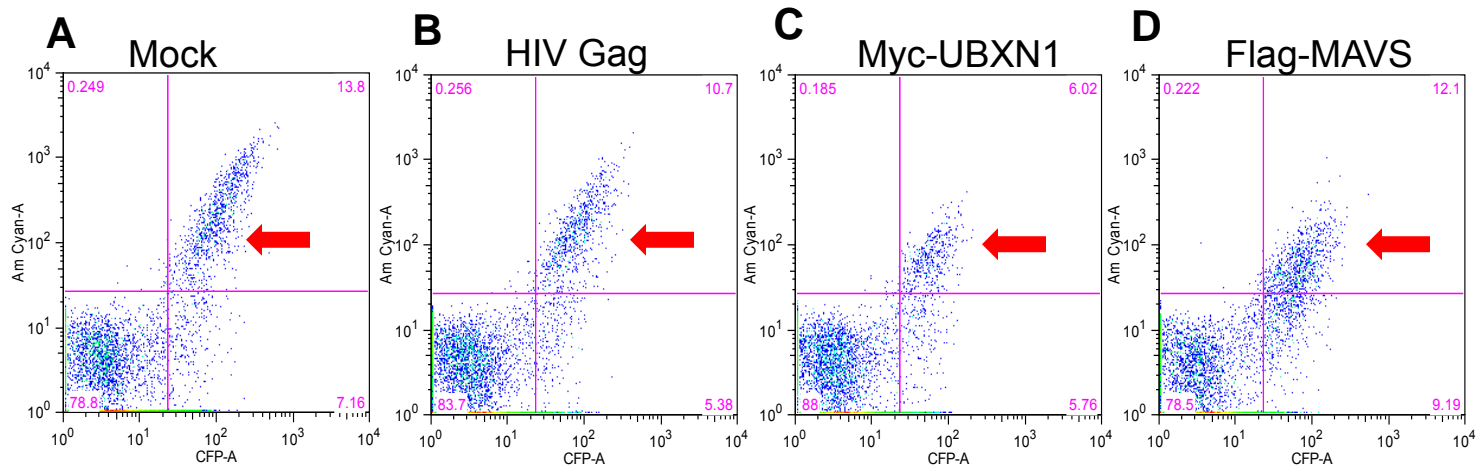

# HIV Gag-CFP+Gag-eYFP

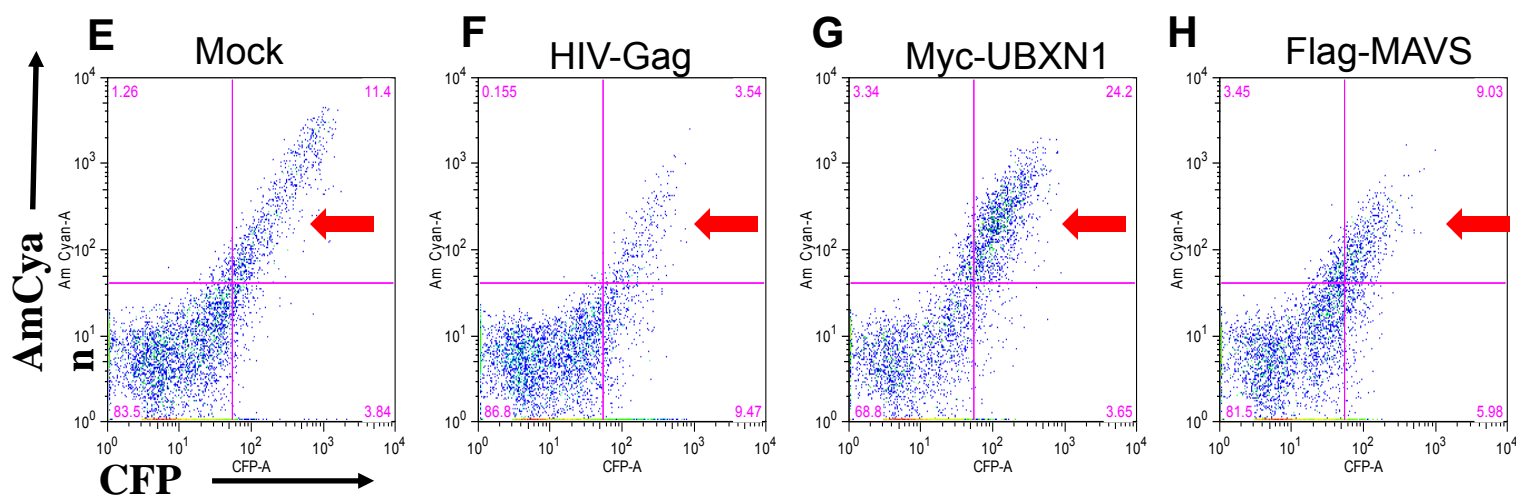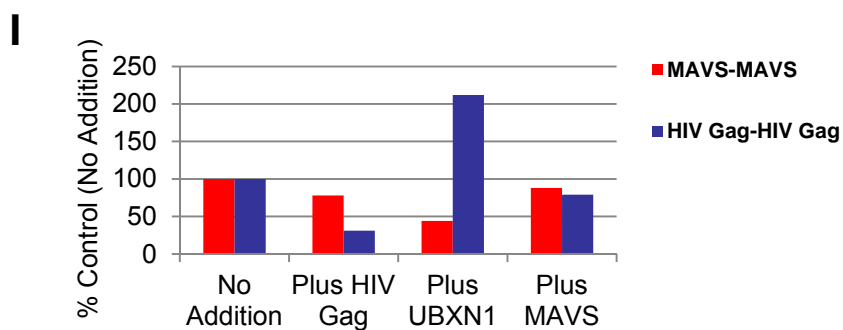

Figure S7

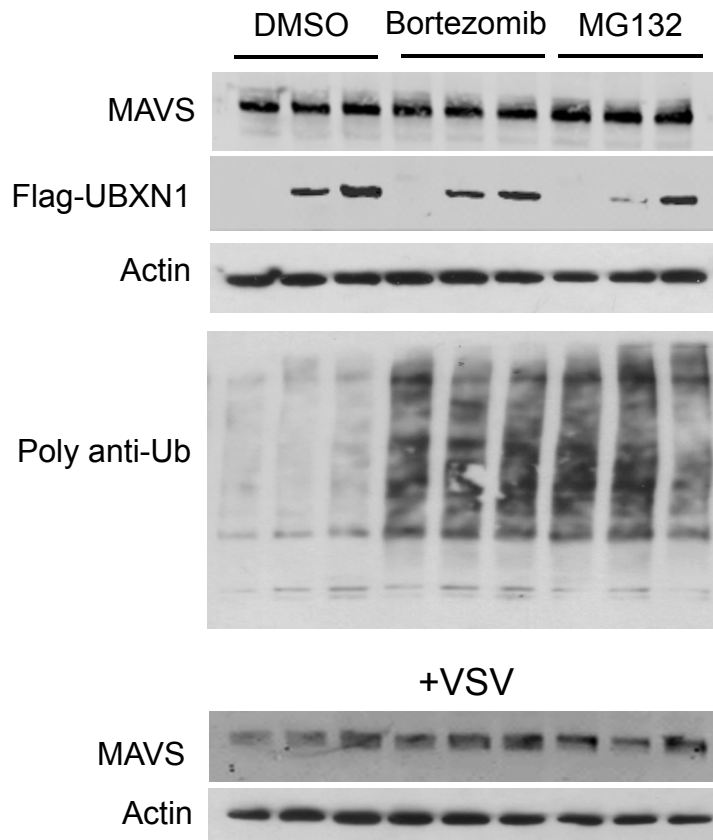

Figure S8
